# Supplementary material for: Extensive and spatially variable within-cell-type heterogeneity across the basolateral amygdala
Source: eLife journal article supplement (doi:10.7554/elife.59003), 2020-09-01
Supplement: supp [file elife-59003-supp-v1.zip]

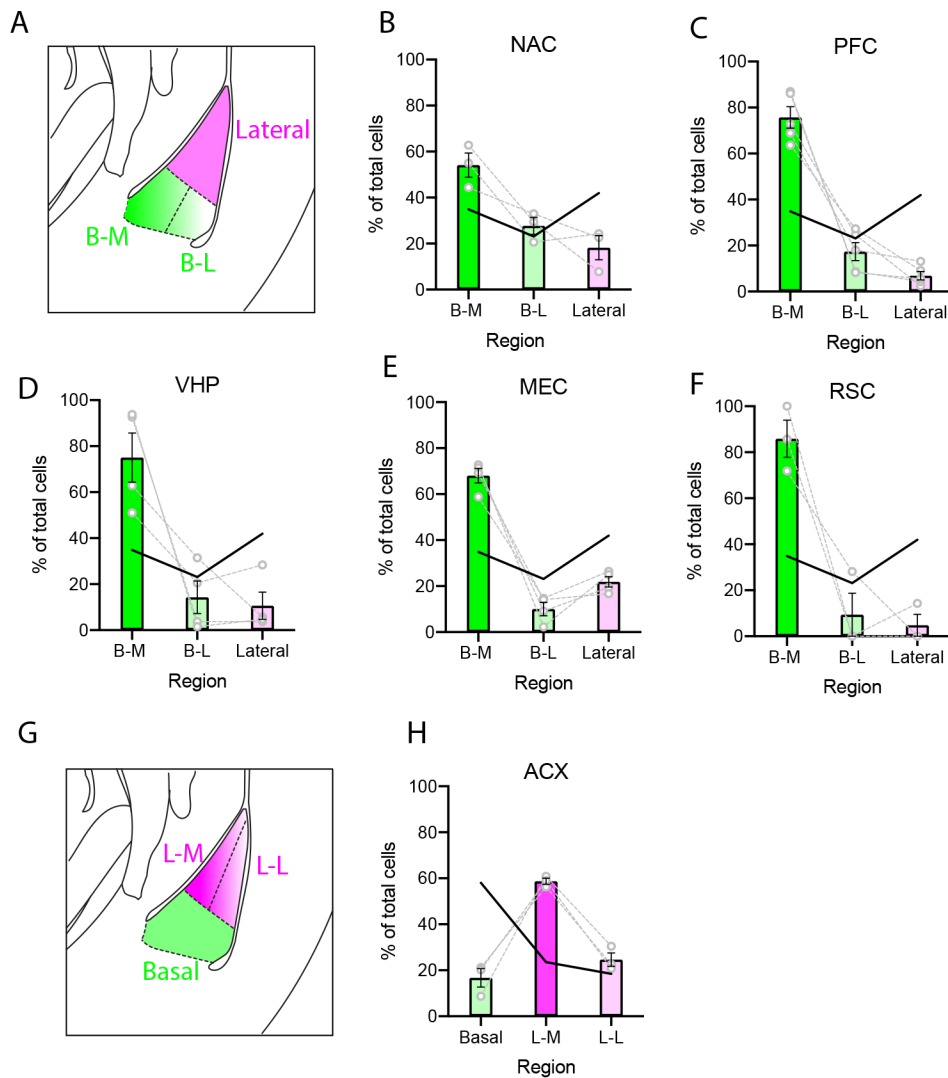

**Figure 7 – figure supplement 1. Spatial gradients of projection neurons are present in the BLA and differ based on projection site.**

A. Illustration of the BLA showing the LA (magenta) and sub-regional parcellation of the BA (green; B-M: basal medial; B-L: basal lateral). B. Percentage of virally labeled NAC projection neurons located within the lateral BLA, and sub-regions of the BA. Individual points and connecting lines represent values from single animals. Bars depict means  $\pm$  SEM. Solid black line indicates percentage of excitatory cells (Slc17a7 positive) expected in each region. C-F. As in (B), except for PFC, VHC, MEC and RSC projection neurons. G. As in (A), except showing parcellation of the LA (L-M: lateral medial; L-L: lateral lateral). H. Percentage of ACX projection cells located within the BA and sub-regions of the LA.
