# Supplementary material for: Extensive and spatially variable within-cell-type heterogeneity across the basolateral amygdala
Source: eLife journal article supplement (doi:10.7554/elife.59003), 2020-09-01
Supplement: supp [file elife-59003-supp-v1.zip]

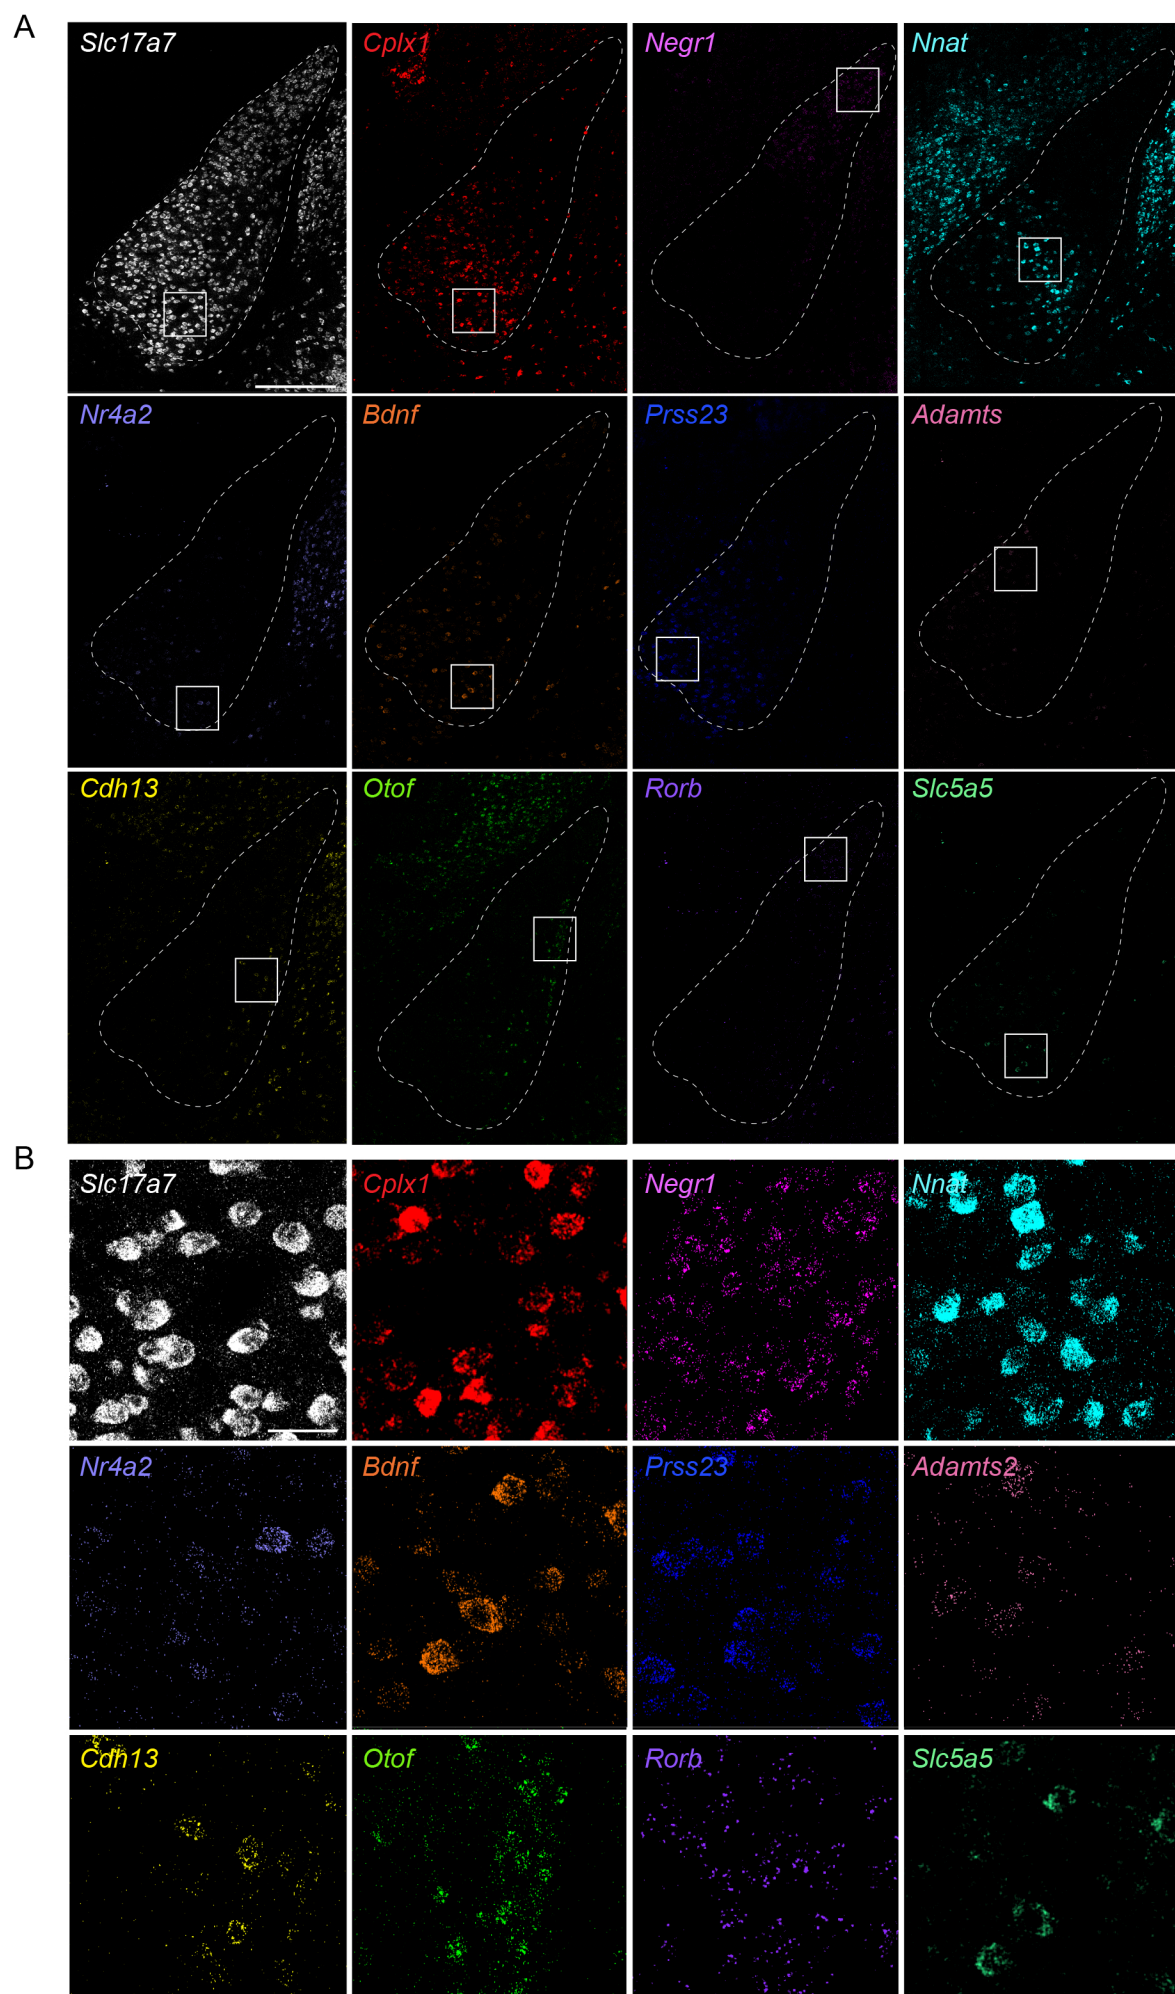

**Figure 6 – figure supplement 1. Individual mFISH marker-gene expression in the BLA.** A. Overview of smFISH signals for the twelve BLA marker genes used in this study. Scale bar: 300 µm. B. Expanded views of marker gene expression, for the respective boxed areas shown in (A). Scale bar: 40 µm.
