# Supplementary material for: Extensive and spatially variable within-cell-type heterogeneity across the basolateral amygdala
Source: eLife journal article supplement (doi:10.7554/elife.59003), 2020-09-01
Supplement: supp [file elife-59003-supp-v1.zip]

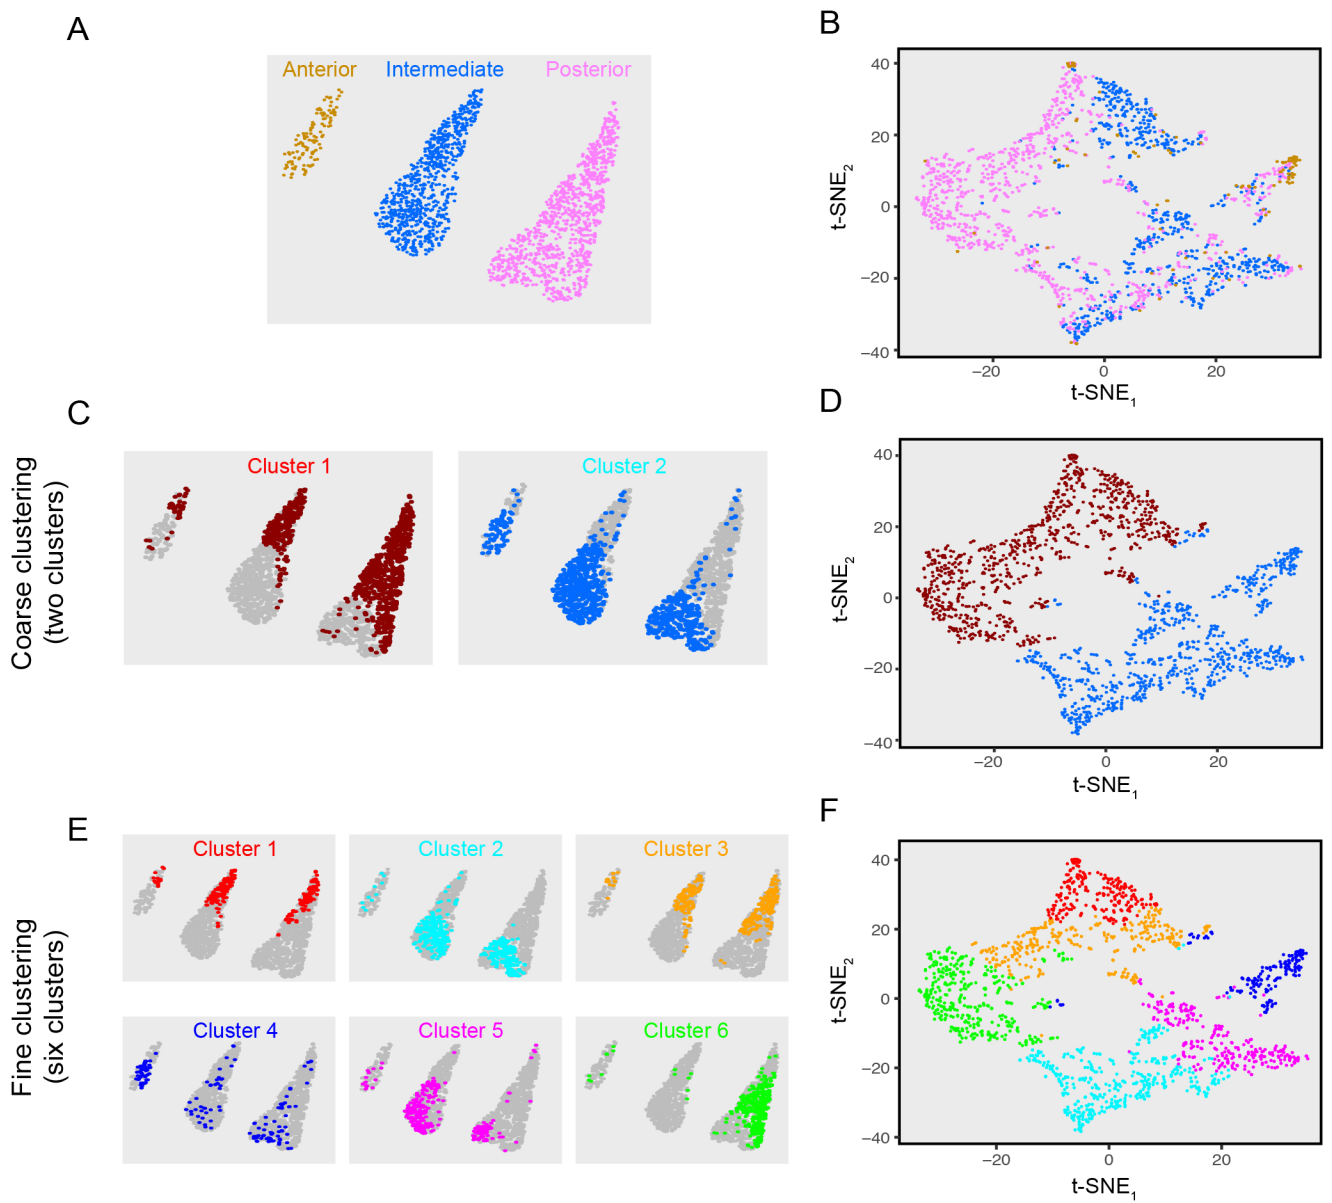

**Figure 6 – figure supplement 2. Clustering of mFISH excitatory neurons.**

A. Points denoting individual excitatory neurons in mFISH data, colored according to respective coronal section. B. t-SNE visualization of mFISH data for the cells shown in (A). C. Spatial location of cells comprising two clusters. D. t-SNE visualization for two excitatory neuron clusters, colored according to cluster identity from (C). E,F. As in (C,D), but for six clusters.
