# Supplementary material for: Extensive and spatially variable within-cell-type heterogeneity across the basolateral amygdala
Source: eLife journal article supplement (doi:10.7554/elife.59003), 2020-09-01
Supplement: supp [file elife-59003-supp-v1.zip]

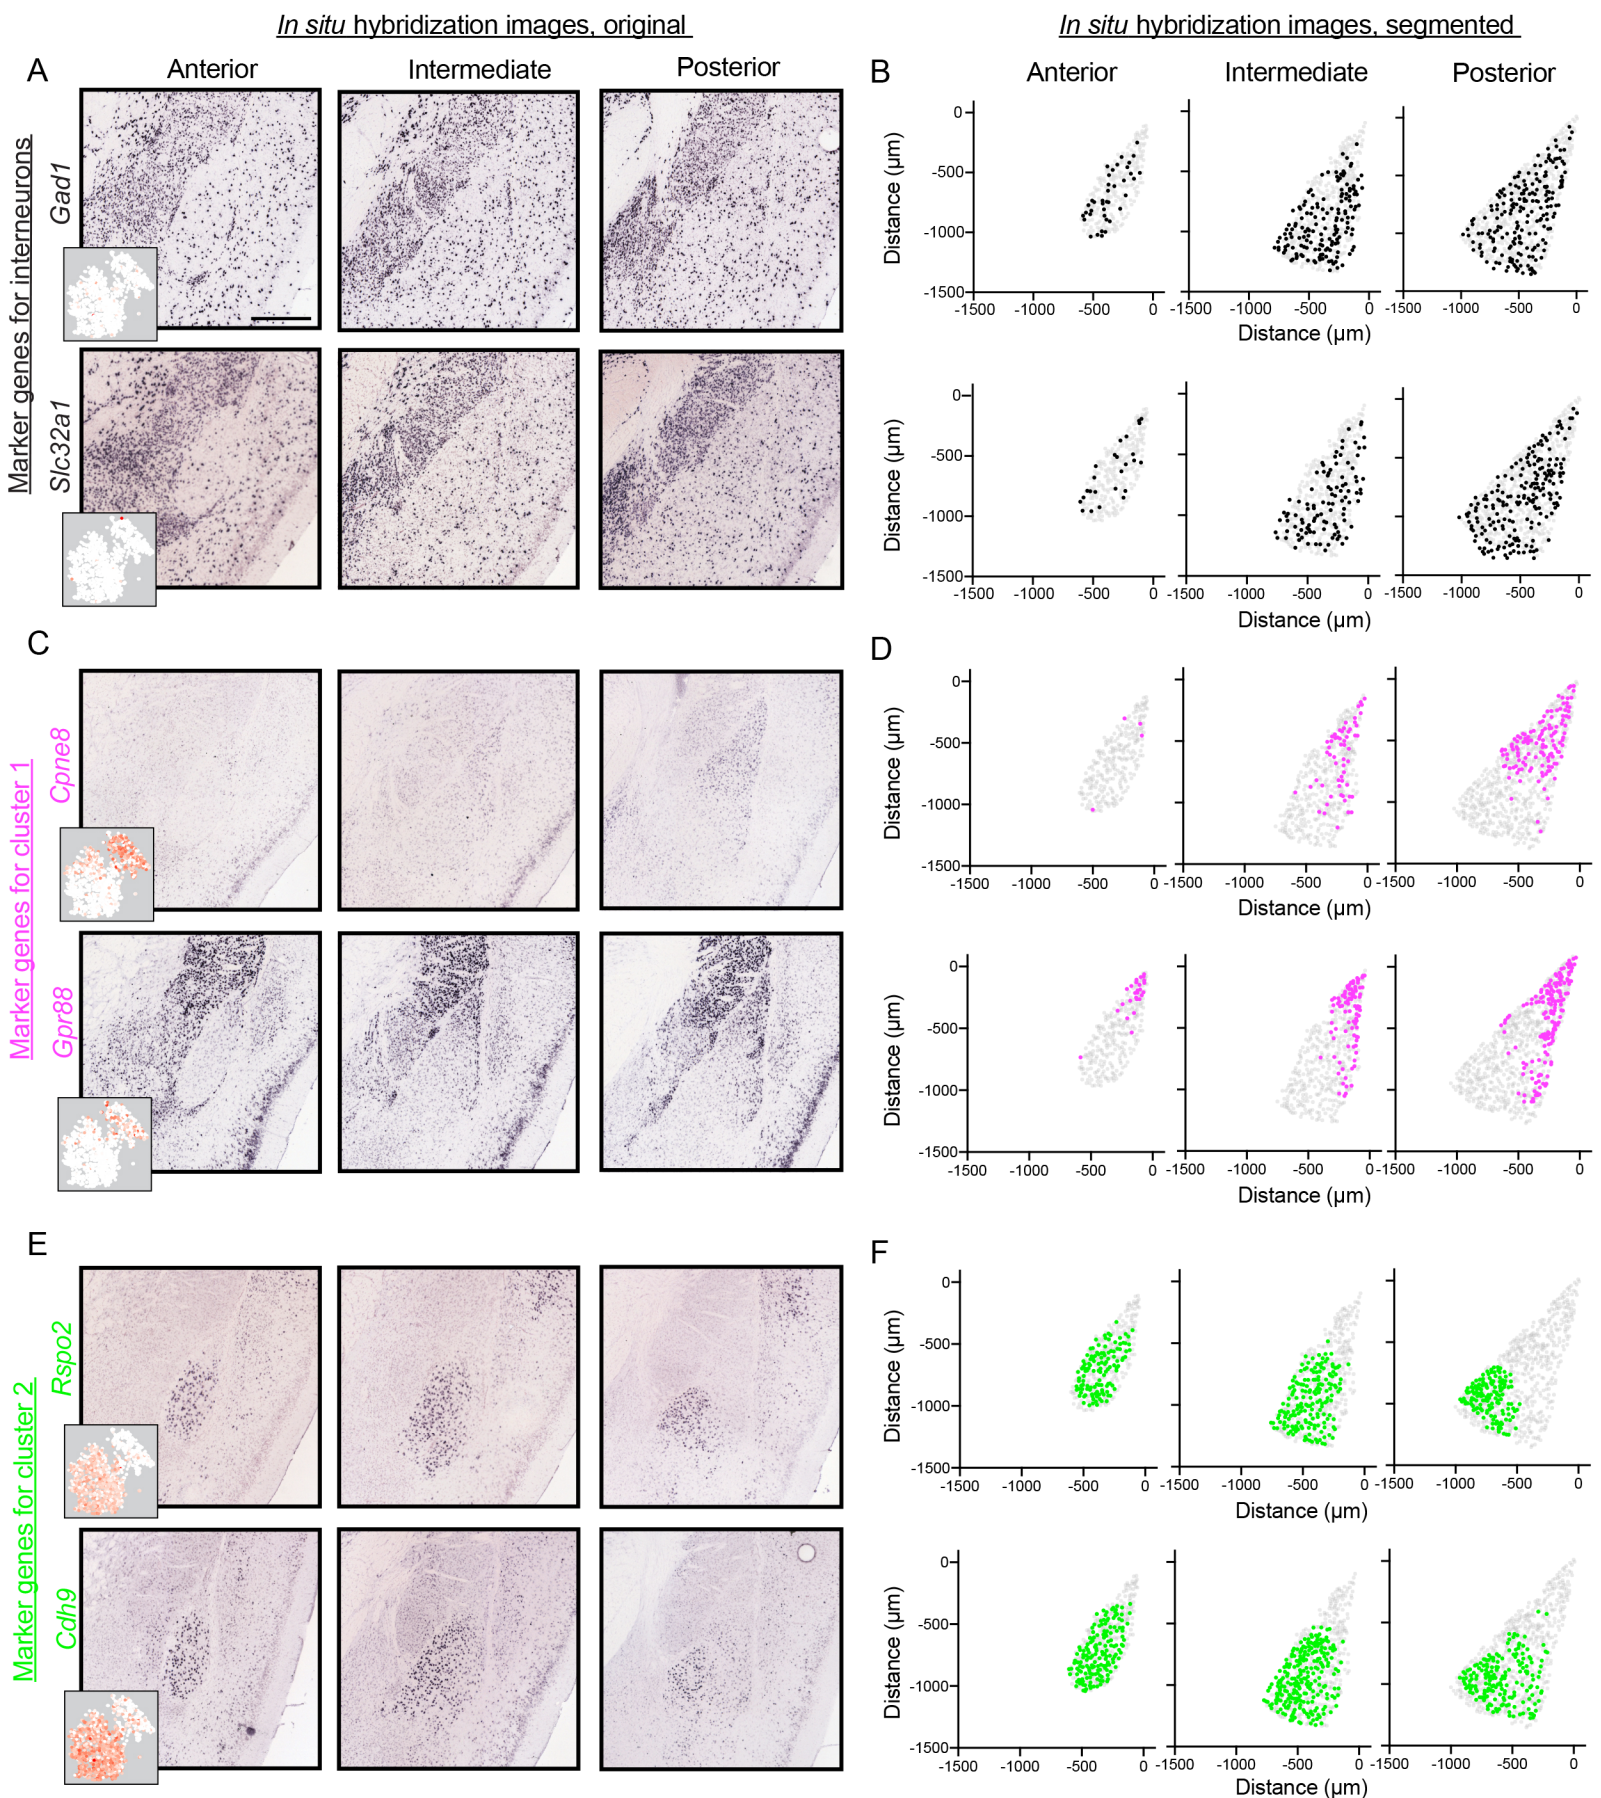

**Figure 3 – figure supplement 1. Spatial organization of inhibitory marker gene expression, and additional cluster-specific marker gene expression.**

A. Representative ISH images for inhibitory neuron marker genes (*Gad1*, *Slc32a1*) along the A/P axis of the BLA (left to right). Inserts show t-SNE visualization of scRNA-seq data for each gene with points colored based on expression levels within cells (white to red). B. Locations of segmented cells for marker genes along the A/P axis of the BLA (anterior, intermediate, posterior). For reference, locations of cells are superimposed on the location of excitatory neurons (*Slc17a7*-positive) within the BLA. C,D. As in (A,B), except for an additional pair of marker genes (*Cpne8*, *Gpr88*) for the LA cluster (cluster 1). E,F. As in (A and B), except for an additional pair (*Rspo2*, *Cdh9*) of marker genes for the BA cluster (cluster 2).
