# Supplementary material for: Extensive and spatially variable within-cell-type heterogeneity across the basolateral amygdala
Source: eLife journal article supplement (doi:10.7554/elife.59003), 2020-09-01
Supplement: supp [file elife-59003-supp-v1.zip]

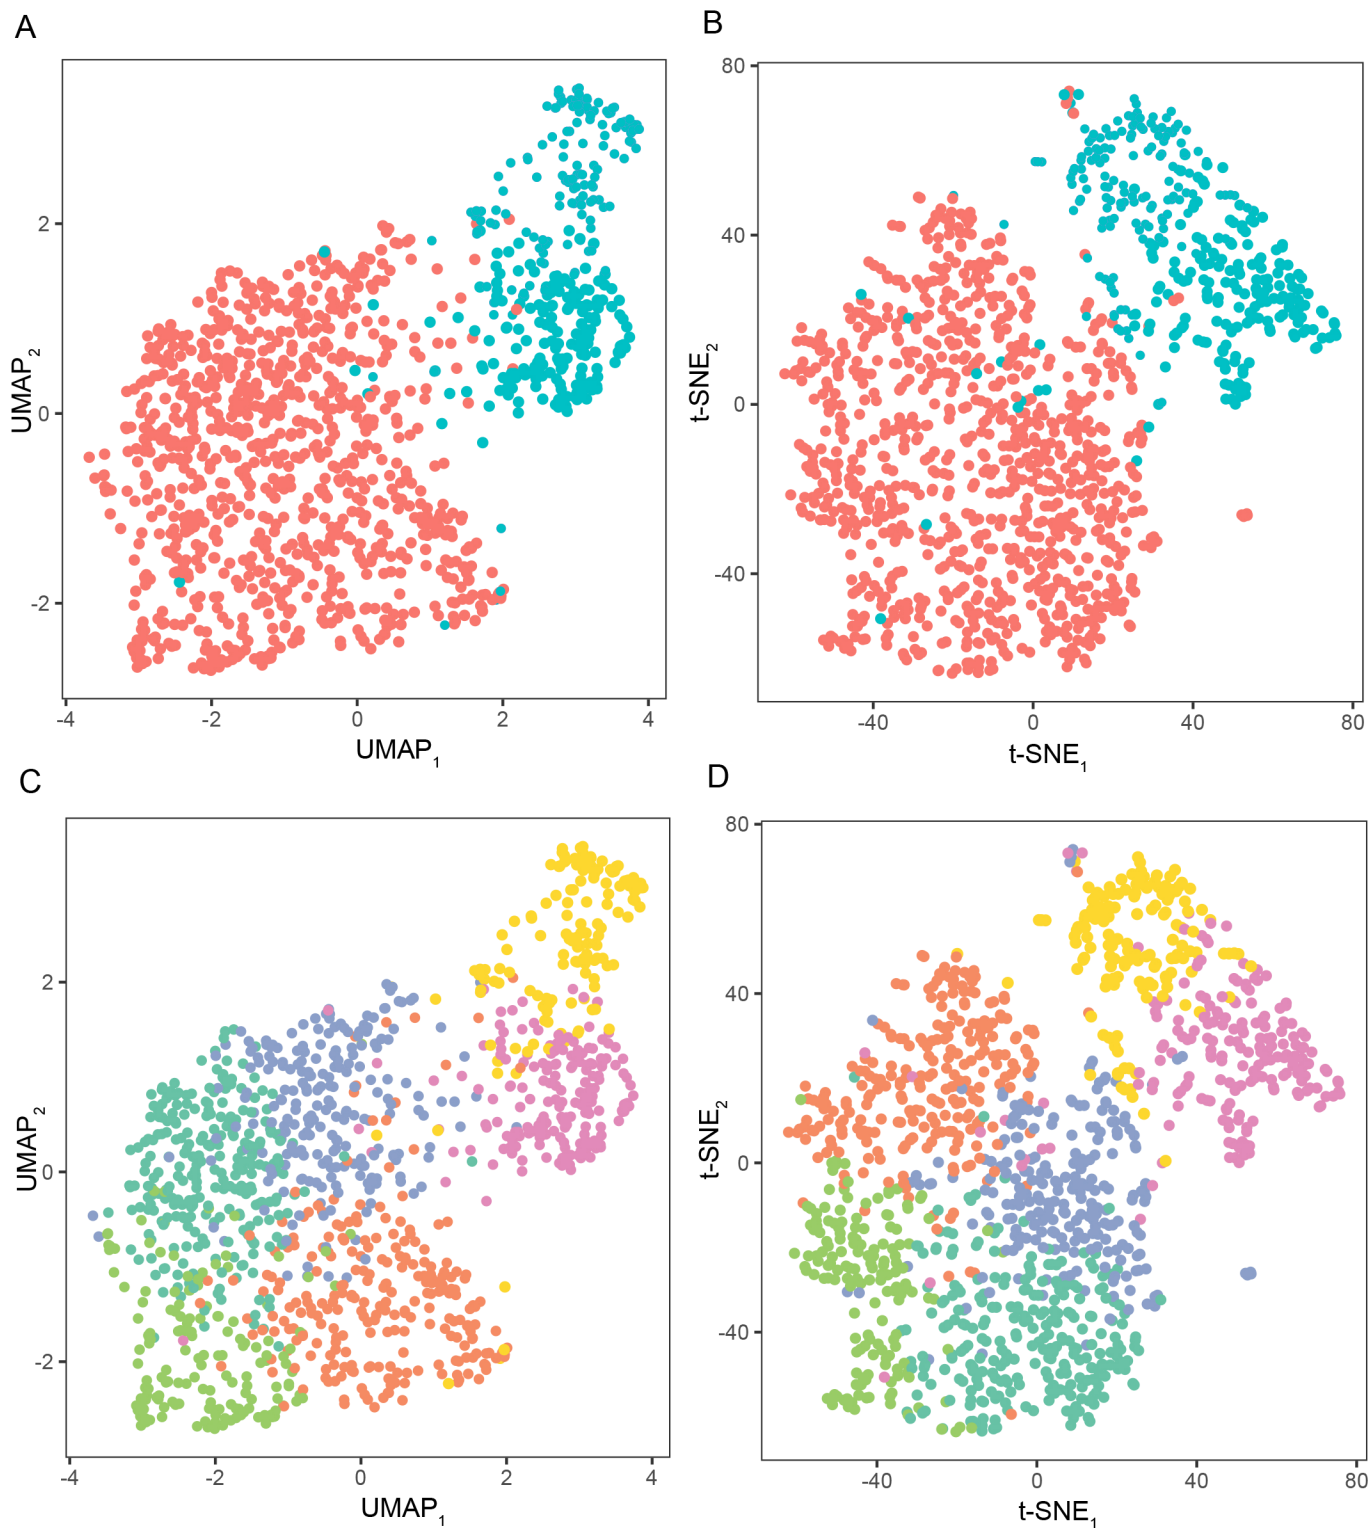

**Figure 2 – figure supplement 1. UMAP and t-SNE dimensionality reduction recapitulate the same general organization.**

A. UMAP visualization of scRNA-seq, with two coarse clusters. B. t-SNE visualization of scRNA-seq data, with two coarse clusters, included for comparison to UMAP reduction. C,D. As in (A,B), but for six finer subpopulations.
