# Supplementary material for: Extensive and spatially variable within-cell-type heterogeneity across the basolateral amygdala
Source: eLife journal article supplement (doi:10.7554/elife.59003), 2020-09-01
Supplement: supp [file elife-59003-supp-v1.zip]

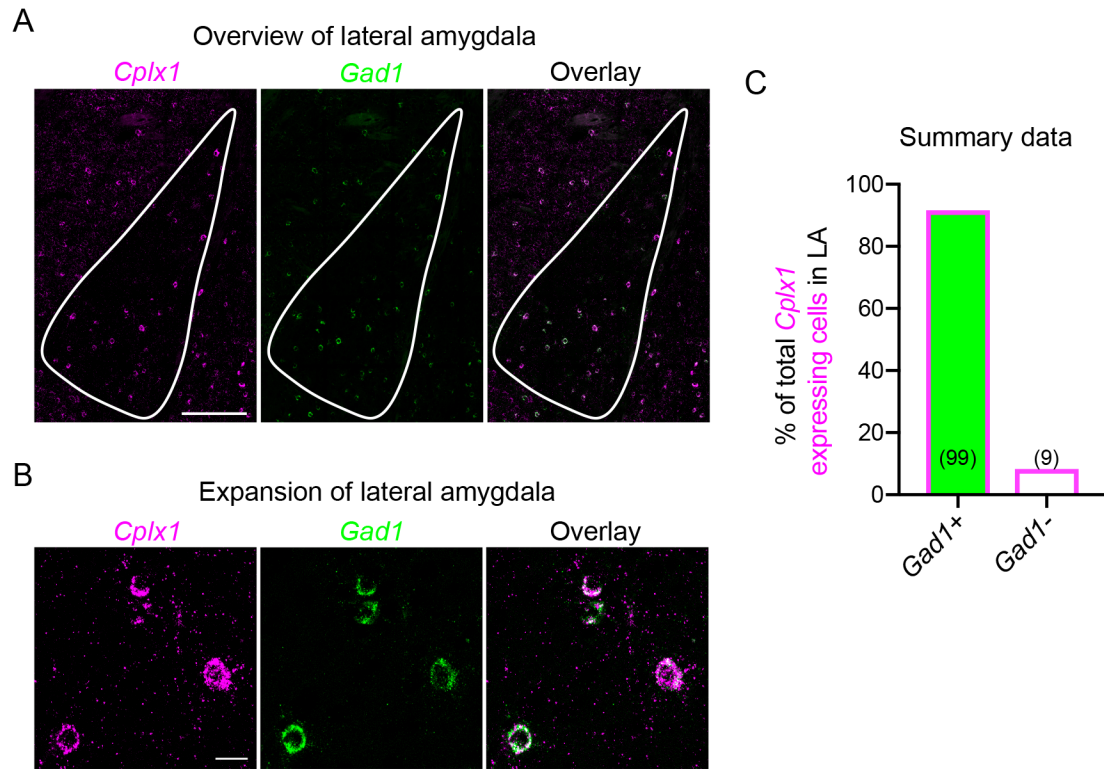

**Figure 3 – figure supplement 2. Cplx1 expression in the lateral amygdala is associated with inhibitory neurons.**

A. Representative mFISH images of Cplx1 and Gad1 expression in the LA. Scale bar: 200  $\mu$ m. B. As in (A), but for an expansion of the LA. Scale bar: 20  $\mu$ m. C. Summary of Cplx1-expressing cells that co-expressed Gad1 in the LA. Numbers within each bar denote total number of cells in each category (n=8 sections from n=3 animals, with cells counted manually).
